# Supplementary material for: Equine Genital Squamous Cell Carcinoma Associated with EcPV2 Infection: RANKL Pathway Correlated to Inflammation and Wnt Signaling Activation
Source: MDPI journal article supplement (doi:10.3390/biology10030244), 2021-03-21
Supplement: s1 [file s1]

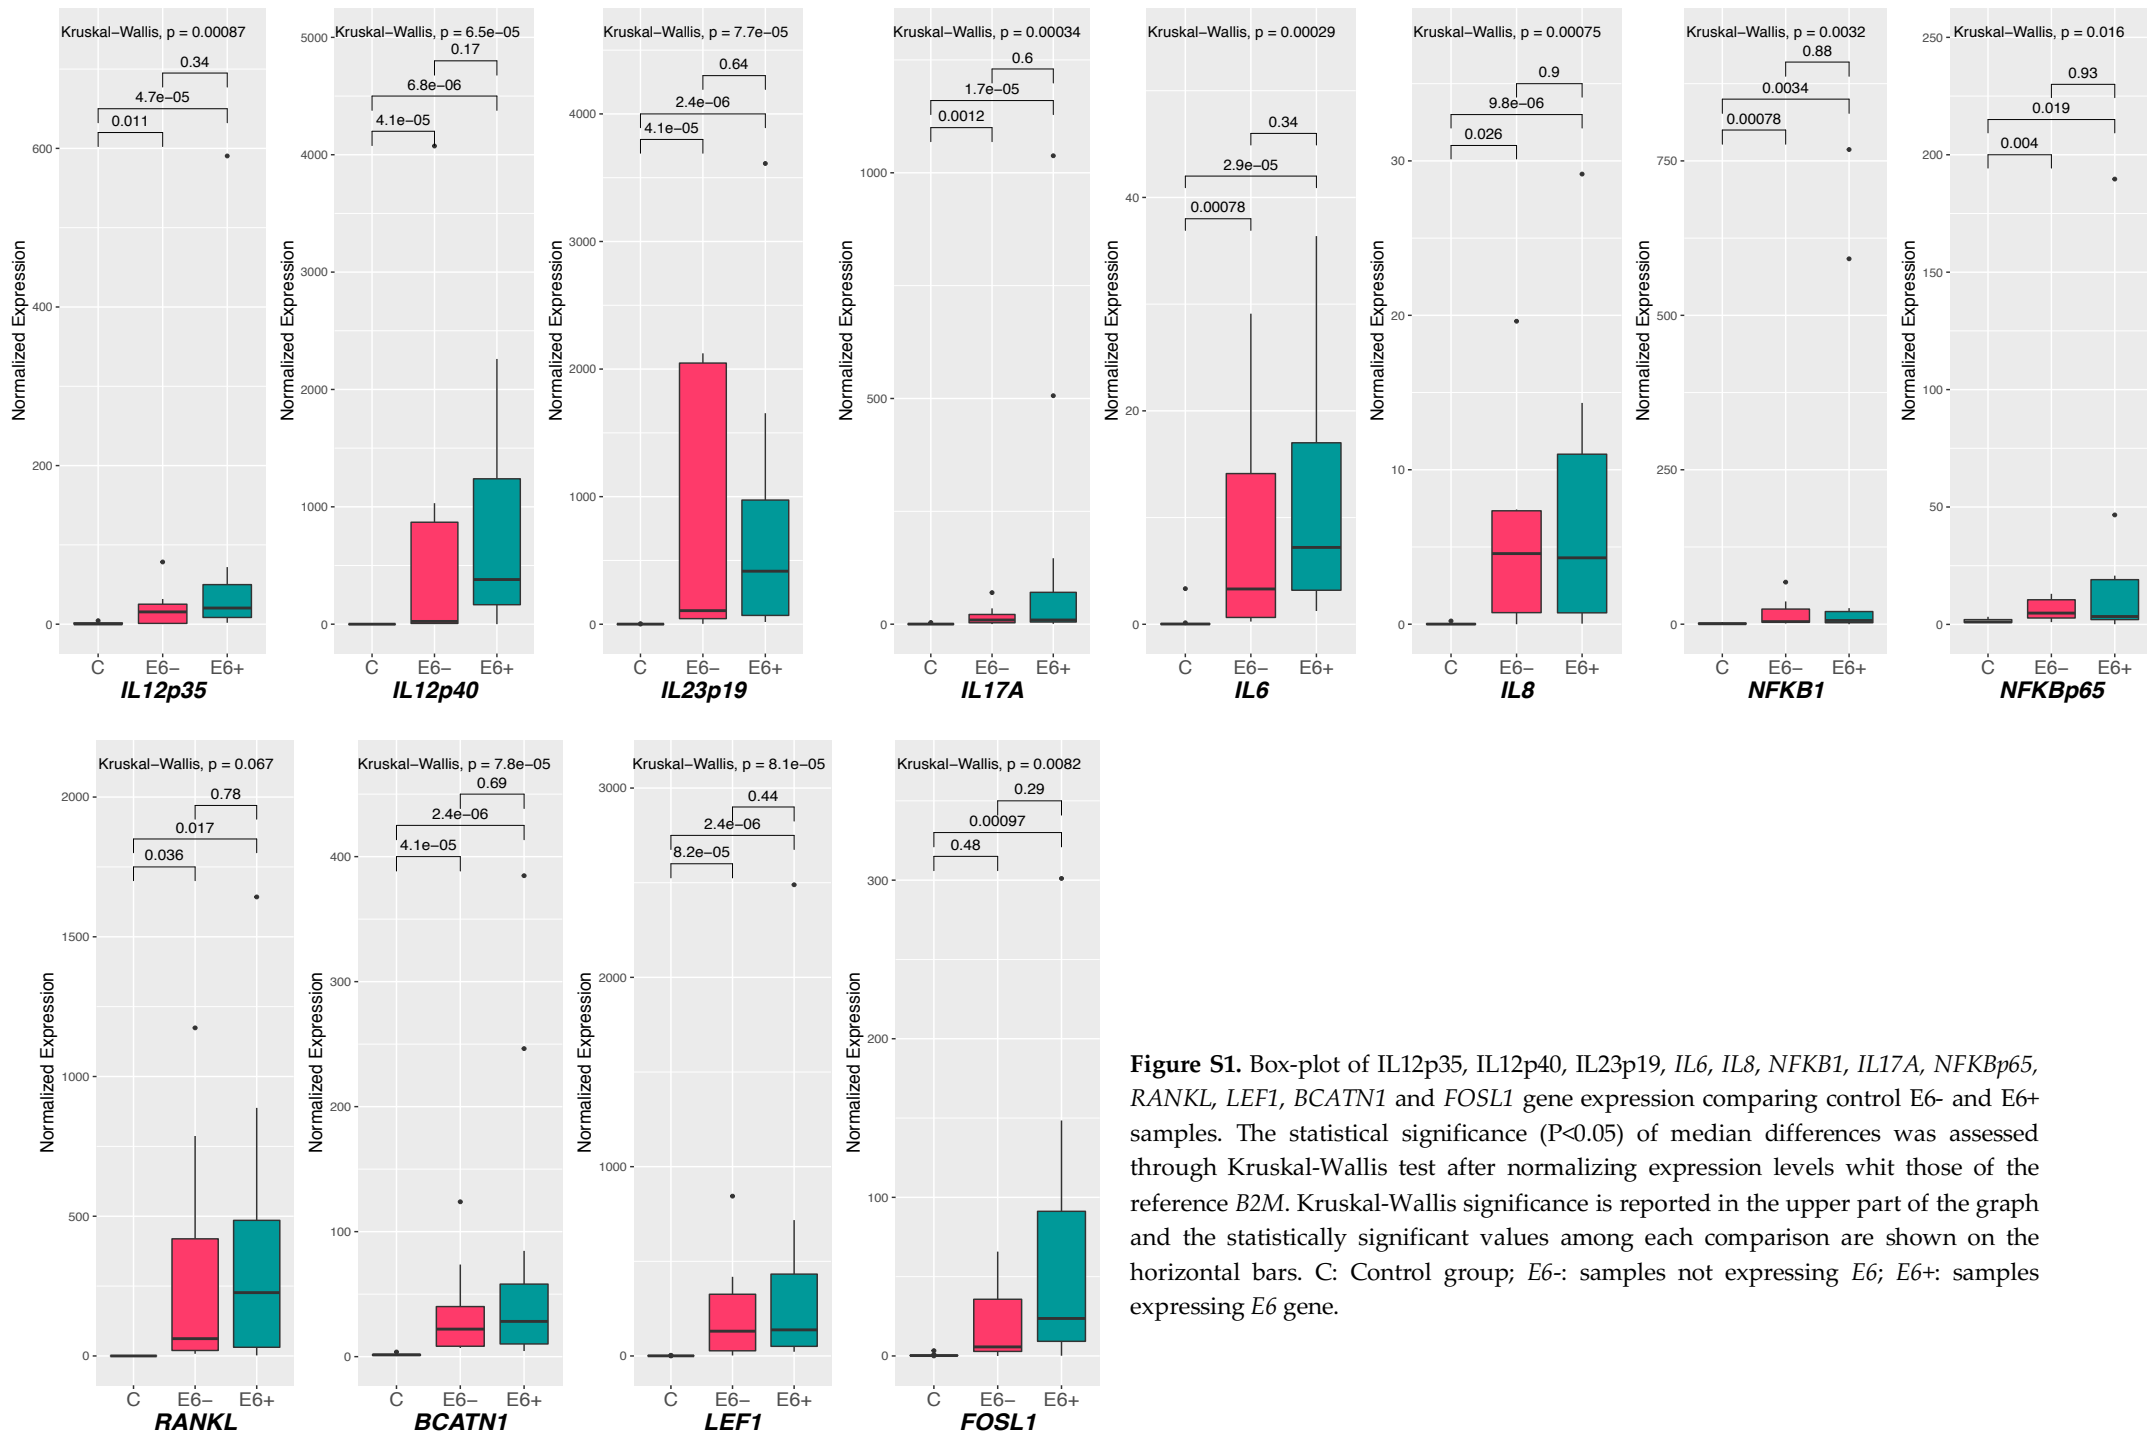

**Figure S1.** Box-plot of IL12p35, IL12p40, IL23p19, IL6, IL8, NFKB1, IL17A, NFKBp65, RANKL, LEF1, BCATN1 and FOSL1 gene expression comparing control E6- and E6+ samples. The statistical significance ( $P < 0.05$ ) of median differences was assessed through Kruskal-Wallis test after normalizing expression levels with those of the reference B2M. Kruskal-Wallis significance is reported in the upper part of the graph and the statistically significant values among each comparison are shown on the horizontal bars. C: Control group; E6-: samples not expressing E6; E6+: samples expressing E6 gene.
